# Supplementary material
Source: PubMed Central journal article supplement (PMC3943920)

## Table of Contents

**Supplemental Table 1.** Exonic rare variants within *PRRX1* region

**Supplemental Figure 1.** Genomic location of targeted regions for the 4 AF candidate genes.

**Supplemental Figure 2.** QQ plot of common variants by unweighted analysis.

**Supplemental Table 1.** Exonic rare variants within *PRRX1* region

| Chromosome | Position*   | dbSNP       | Reference allele | Alternative allele | Effect     | Allele change | Residue change | Damaging Potential <sup>†</sup> |
|------------|-------------|-------------|------------------|--------------------|------------|---------------|----------------|---------------------------------|
| 1          | 170,688,889 |             | A                | G                  | Synonymous | GAA=>GAG      | E88E           |                                 |
| 1          | 170,688,894 | rs79567938  | A                | G                  | Missense   | AAG=>AGG      | K90R           |                                 |
| 1          | 170,688,957 |             | G                | A                  | Missense   | CGT=>CAT      | R111H          | D                               |
| 1          | 170,689,011 |             | G                | A                  | Missense   | CGC=>CAC      | R129H          | D                               |
| 1          | 170,689,021 |             | C                | T                  | Synonymous | AAC=>AAT      | N132N          |                                 |
| 1          | 170,689,027 |             | C                | T                  | Synonymous | ACC=>ACT      | T134T          |                                 |
| 1          | 170,689,033 |             | G                | C                  | Synonymous | GCG=>GCC      | A136A          |                                 |
| 1          | 170,695,377 |             | G                | A                  | Missense   | CGA=>CAA      | R145Q          | D                               |
| 1          | 170,695,435 |             | C                | G                  | Synonymous | CTC=>CTG      | L164L          |                                 |
| 1          | 170,695,456 |             | C                | T                  | Synonymous | GAC=>GAT      | D171D          |                                 |
| 1          | 170,695,466 | rs201365132 | G                | T                  | Missense   | GTG=>TTG      | V175L          |                                 |
| 1          | 170,695,472 |             | C                | G                  | Missense   | CAG=>GAG      | Q177E          | D                               |
| 1          | 170,695,522 |             | G                | A                  | Nonsense   | TGG=>TGA      | W193*          | D                               |
| 1          | 170,699,429 |             | T                | A                  | Missense   | CTC=>CAC      | L204H          |                                 |
| 1          | 170,705,236 |             | A                | C                  | Missense   | CAG=>CCG      | Q216P          | D                               |
| 1          | 170,705,313 | rs201359953 | C                | T                  | Missense   | CCA=>TCA      | P242S          | D                               |

\* The position is based on NCBI Genome Build 37 (hg19).

<sup>†</sup> “D” indicates that nonsense variants or variants located in the splicing sites or missense variants predicted to causing damaging effects to the encoded proteins based on PolyPhen (<http://genetics.bwh.harvard.edu/pph2/>).

**Supplemental Figure 1.** Genomic location of targeted regions for the 4 AF candidate genes. The blue bars represent the exonic regions, whereas the red bars indicate the overlap with the genomic regions actually covered by our targeted sequencing approach.

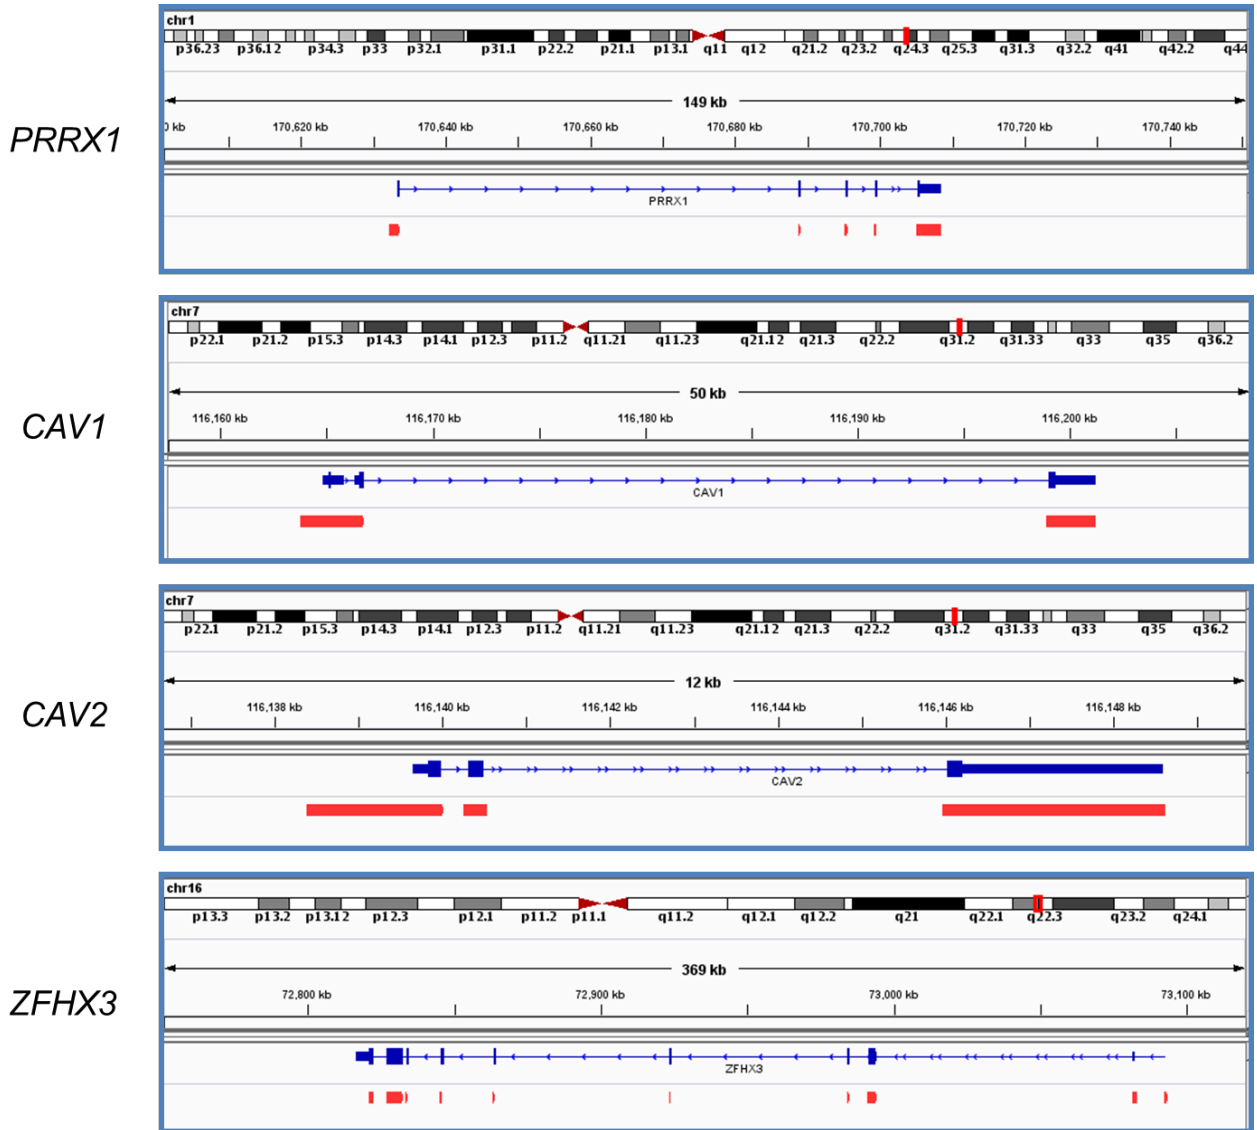

**Supplemental Figure 2.** QQ plot of common variants by unweighted analysis. Each point represents one common variant. The x-axis represents the distribution of  $-\log_{10}$  p-values if no association were present, whereas y-axis represents the distribution of  $-\log_{10}$  p-values in our study. Only one SNP (rs11265611,  $P=1.7 \times 10^{-6}$ ) significantly deviated from the diagonal line, indicating a strong association between the SNP and AF.

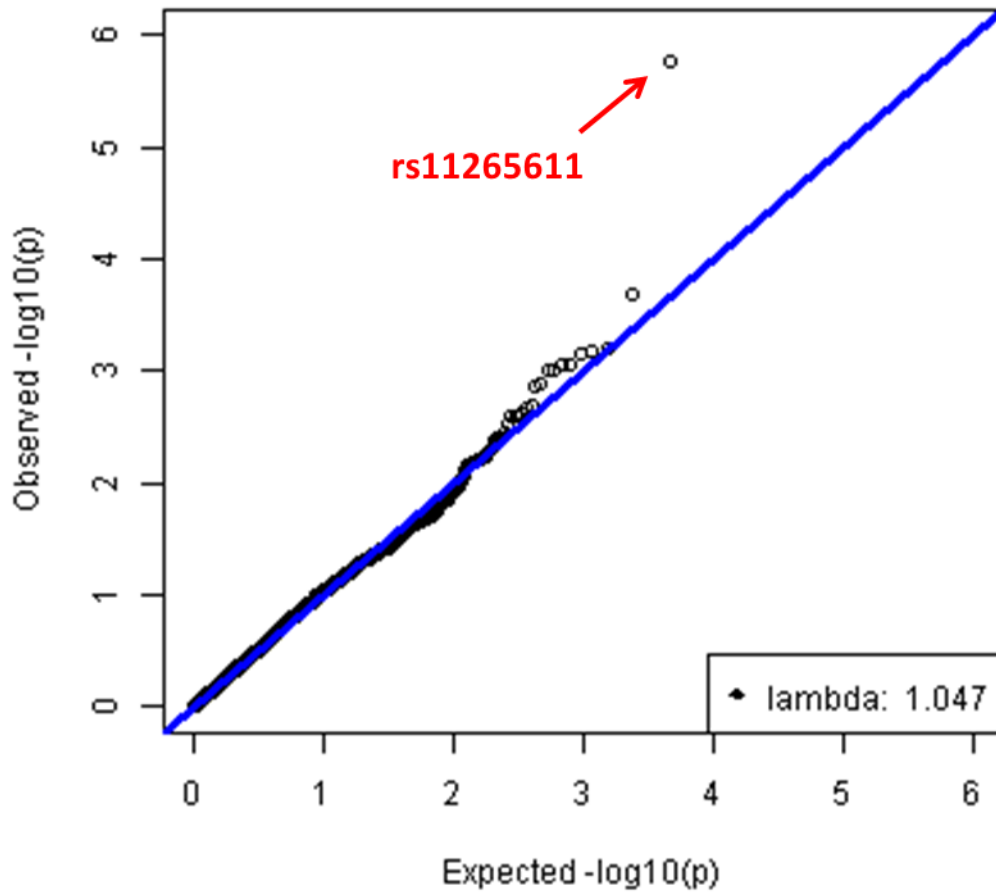

Supplement: NIHMS542460-supplement-1.pdf [file NIHMS542460-supplement-1.pdf]
